# Supplementary material for: Determinants and consequences of short birth interval in rural Bangladesh: a cross-sectional study
Source: PubMed Central journal article supplement (PMC4314752; doi:10.1186/s12884-014-0427-6), 2014-12-24

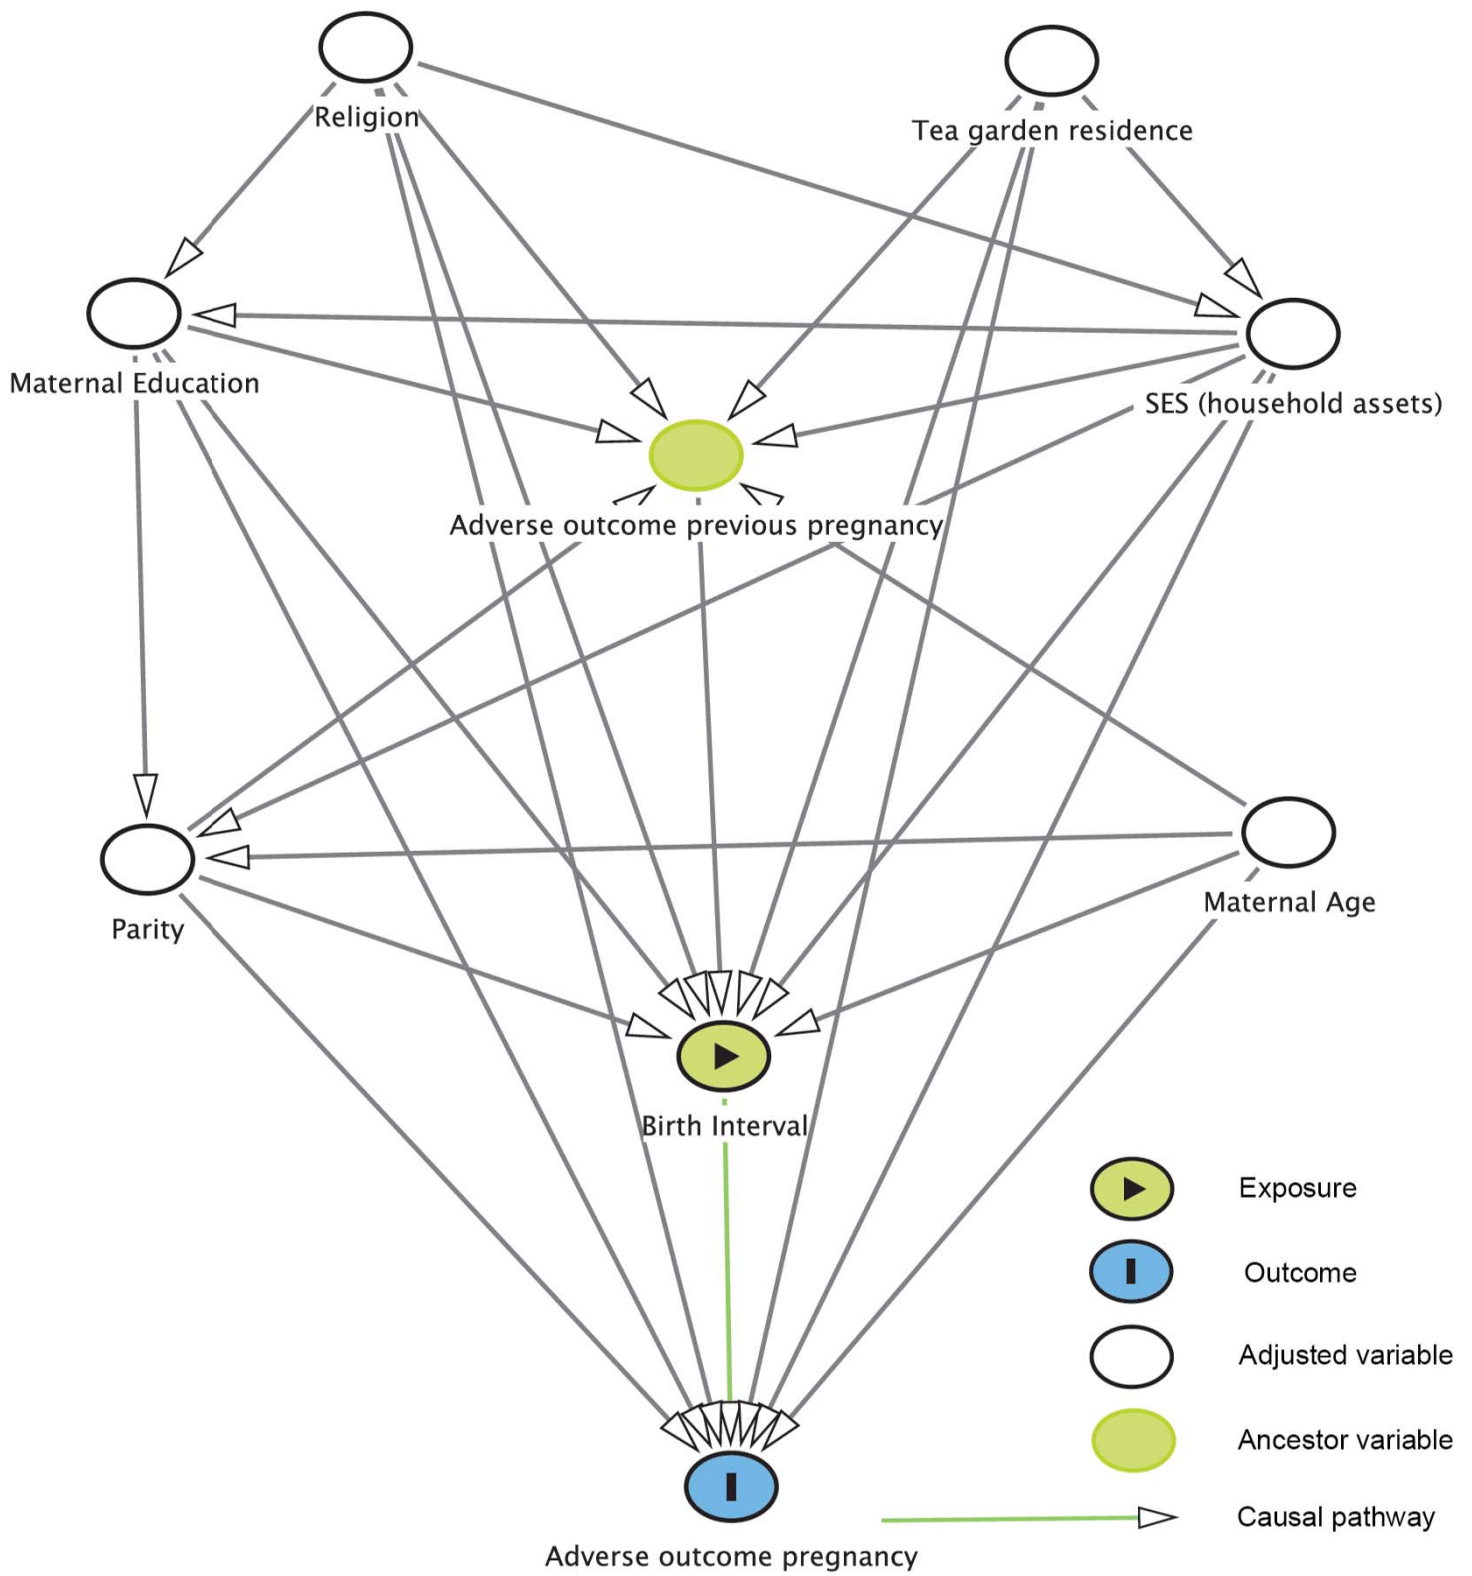

Supplement: 12884_2014_427_MOESM1_ESM.pdf [file 12884_2014_427_MOESM1_ESM.pdf]
